# Supplementary material for: Docetaxel vs. Novel Hormonal Agent for Upfront Management of De Novo Metastatic Hormone-Sensitive Prostate Cancer: A Comprehensive Report of a Single-Center Experience
Source: Research Square preprint supplement (doi:10.21203/rs.3.rs-659032/v1), 2021-07-29
Supplement: Supplementary file 2 [file 8dcd5ba965bb7208d8478c77.xlsx]

## Sheet: Sheet1
		Single Variable		Multivariable
Variable	n	HR (95% CI)	pvalue	HR (95% CI)	pvalue
Treatment
NHA	41	Ref		Ref
Docetaxel	51	1.83 (1.05-3.19)	0.03403	1.96 (1.12-3.45)	0.01907
log PSA	92	1.47 (1.11-1.95)	0.00803	1.34 (0.99-1.83)	0.05804
Age Category
65 and Over	53	Ref		Ref
Under 65	39	1.5 (0.9-2.51)	0.11987	1.63 (0.96-2.75)	0.06968
ECOG Score
0	40	Ref
1+	27	1.49 (0.84-2.63)	0.17547
Missing	25	0.63 (0.3-1.35)	0.23649
Metastasis Burden
High burden	67	Ref		Ref
Low burden	25	0.52 (0.28-0.96)	0.03728	0.57 (0.3-1.09)	0.08961
Race/Ethnicity
White	43	Ref
Black or African American	22	1.28 (0.66-2.49)	0.46077
Hispanic/Latino	8	1.37 (0.6-3.16)	0.45469
Other	19	0.88 (0.45-1.73)	0.70759
