# Supplementary material for: Docetaxel vs. Novel Hormonal Agent for Upfront Management of De Novo Metastatic Hormone-Sensitive Prostate Cancer: A Comprehensive Report of a Single-Center Experience
Source: Research Square preprint supplement (doi:10.21203/rs.3.rs-659032/v1), 2021-07-29
Supplement: Supplementary file 3 [file bcb938cc984fc8c50ddfd032.xlsx]

## Sheet: Sheet1
		Single Variable		Multivariable
Variable	n	HR (95% CI)	pvalue	HR (95% CI)	pvalue
PSA_Category
PSA < 0.2	21	Ref		Ref
PSA 0.2-4	36	4.11 (1.69-9.95)	0.00176	5.06 (1.98-12.97)	0.00072
PSA 4+	29	5.63 (2.25-14.11)	0.00022	6.42 (2.43-16.95)	0.00018
Age_Category
65 and Over	53	Ref		Ref
Under 65	39	1.73 (1.02-2.92)	0.04037	2.4 (1.35-4.25)	0.00278
ECOG_Score
0	40	Ref
1+	27	1.44 (0.81-2.57)	0.2189
Missing	25	0.52 (0.23-1.2)	0.12431
Metastatic_Burden
High burden	67	Ref		Ref
Low burden	25	0.49 (0.26-0.92)	0.02558	0.72 (0.37-1.4)	0.33595
RaceEthnicity
White	43	Ref
Black or African American	22	1.22 (0.6-2.47)	0.58342
Hispanic/Latino	8	1.42 (0.61-3.28)	0.41124
Other	19	0.91 (0.46-1.8)	0.79146
