# Supplementary material for: Docetaxel vs. Novel Hormonal Agent for Upfront Management of De Novo Metastatic Hormone-Sensitive Prostate Cancer: A Comprehensive Report of a Single-Center Experience
Source: Research Square preprint supplement (doi:10.21203/rs.3.rs-659032/v1), 2021-07-29
Supplement: Supplementary file 4 [file e06aff4eed9136729543701d.xlsx]

## Sheet: NHA only
Supplemental Table 7
		Single Variable		Multivariable
Variable	n	HR (95% CI)	pvalue	HR (95% CI)	pvalue
PSA_Category
PSA < 0.2	15	Ref		Ref
PSA 0.2-4	16	5.36 (1.49-19.31)	0.01015	6.01 (1.54-23.44)	0.00983
PSA 4+	9	6.27 (1.29-30.45)	0.02273	6.83 (1.33-35.09)	0.02131
Age_Category
65 and Over	23	Ref		Ref
Under 65	17	0.86 (0.34-2.17)	0.7535	1.31 (0.48-3.58)	0.60367
ECOG_Score
0	16	Ref
1+	12	1.57 (0.58-4.2)	0.37262
Missing	12	0.27 (0.06-1.23)	0.09048
Metastatic_Burden
High burden	29	Ref		Ref
Low burden	11	0.84 (0.3-2.37)	0.73977	1.17 (0.38-3.58)	0.7809
RaceEthnicity
White	20	Ref
Black or African American	10	1.26 (0.43-3.71)	0.67625
Hispanic/Latino	3	0.96 (0.2-4.55)	0.95954
Other	7	0.57 (0.12-2.62)	0.46585

## Sheet: Docetaxel only
		Single Variable		Multivariable
Variable	n	HR (95% CI)	pvalue	HR (95% CI)	pvalue
PSA_Category
PSA < 0.2	6	Ref		Ref
PSA 0.2-4	20	3.11 (0.89-10.84)	0.07452	3.42 (0.84-13.88)	0.08588
PSA 4+	20	4.62 (1.29-16.56)	0.01872	4.35 (1.02-18.55)	0.04666
Age_Category
65 and Over	25	Ref		Ref
Under 65	21	2.73 (1.43-5.22)	0.00233	3.31 (1.65-6.66)	0.00078
ECOG_Score
0	24	Ref
1+	13	1.32 (0.64-2.73)	0.4518
Missing	9	0.95 (0.35-2.61)	0.92202
Metastatic_Burden
High burden	33	Ref		Ref
Low burden	13	0.39 (0.17-0.87)	0.0211	0.56 (0.23-1.37)	0.20225
RaceEthnicity
White	21	Ref
Black or African American	9	1.2 (0.47-3.08)	0.69878
Hispanic/Latino	5	1.61 (0.59-4.41)	0.35476
Other	11	0.99 (0.45-2.15)	0.97286
